# Supplementary material
Source: MDPI journal article supplement (https://www.mdpi.com/2311-7524/9/11/1216)
Supplement: s1 [file s1]

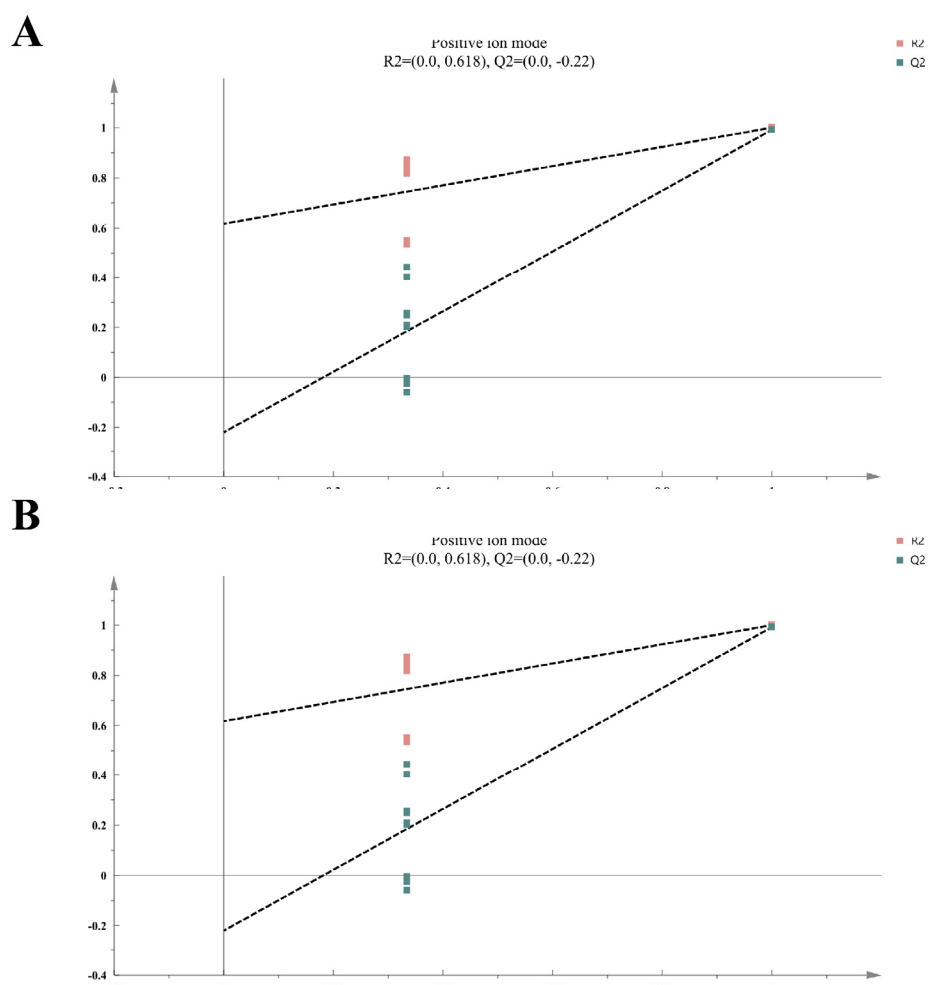

Figure S1 The permutations plot was used to verify the test of the PLS-DA model under positive (A) and negative ion mode (B).

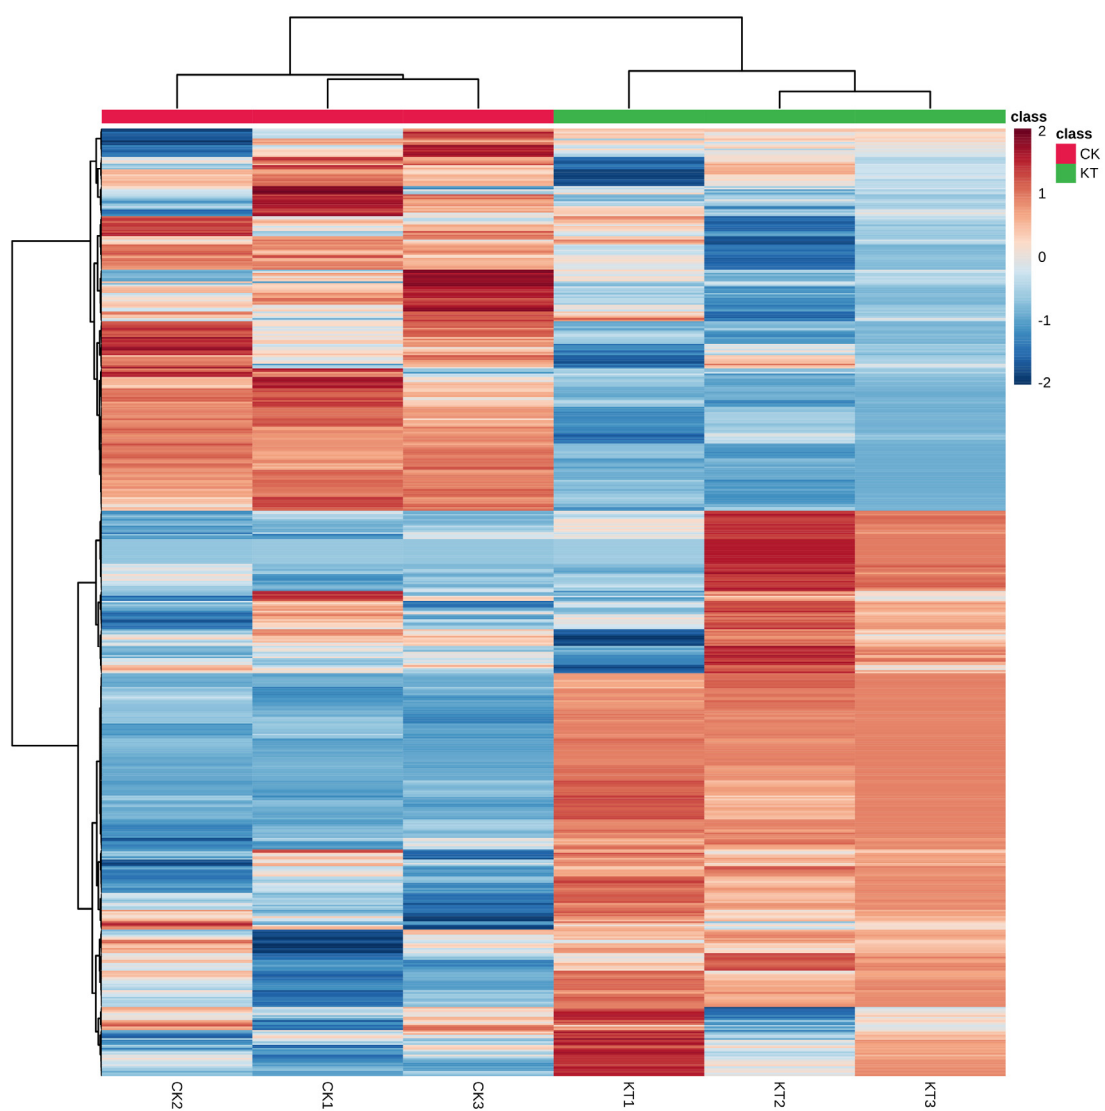

Figure S2 All metabolites identified in positive ion mode of the Lanzhou lily bulbs between CK and KT

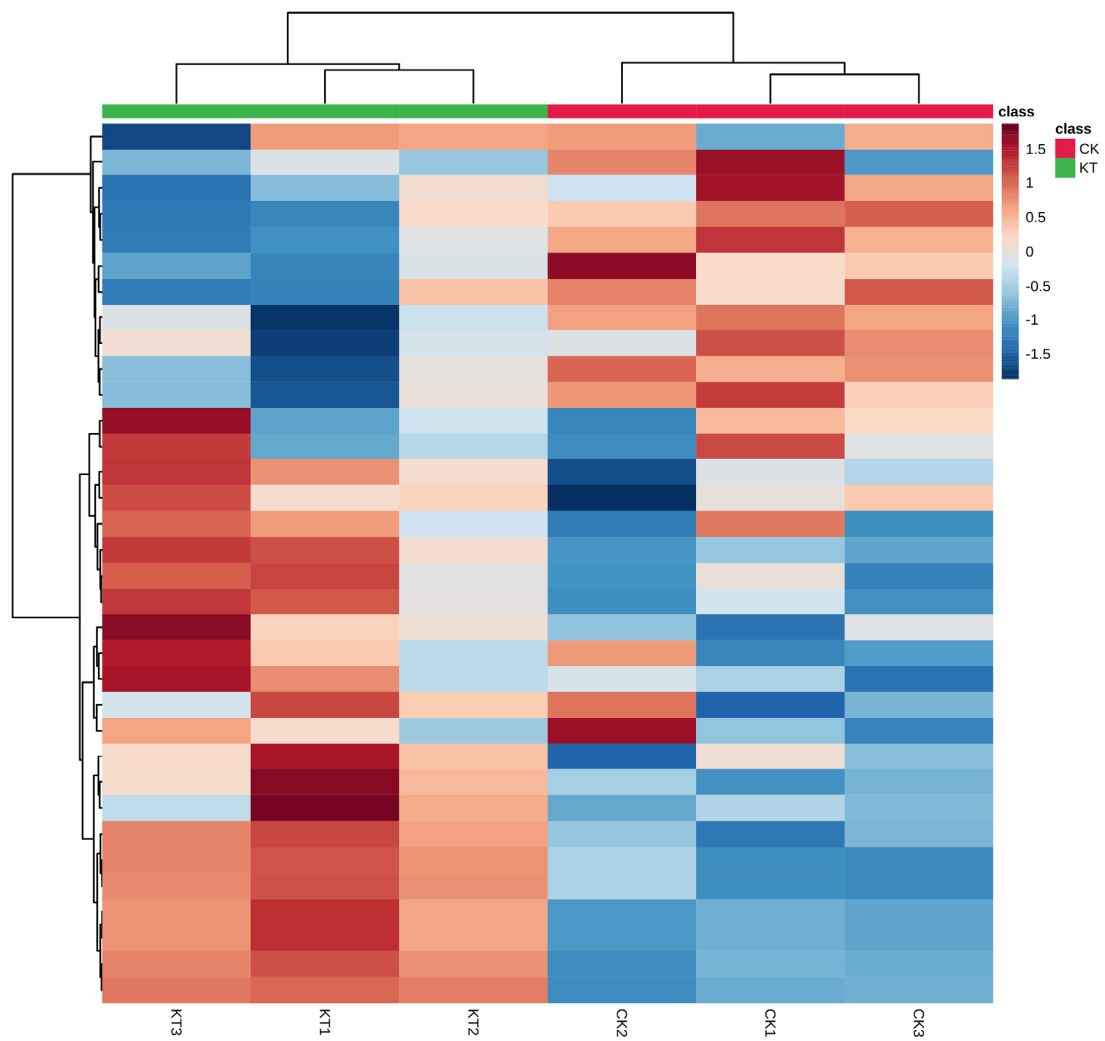

Figure S3 All metabolites identified in negative ion mode of the Lanzhou lily bulbs between CK and KT
